# Supplementary material for: Pre-existing Immunity to Oncolytic Virus Potentiates Its Immunotherapeutic Efficacy
Source: PubMed Central journal article supplement — Mol Ther. 2018 Jan 31;26(4):1008–19. doi: 10.1016/j.ymthe.2018.01.019 (PMC6079372; doi:10.1016/j.ymthe.2018.01.019), 2018-01-31
Supplement: mmc1.pdf [file mmc1.pdf]

YMTHE, Volume 26

## **Supplemental Information**

### **Pre-existing Immunity to Oncolytic Virus**

### **Potentiates Its Immunotherapeutic Efficacy**

**Jacob M. Ricca, Anton Oseledchyk, Tyler Walther, Cailian Liu, Levi Mangarin, Taha Merghoub, Jedd D. Wolchok, and Dmitriy Zamarin**

## Supplementary Materials

Figure S1.

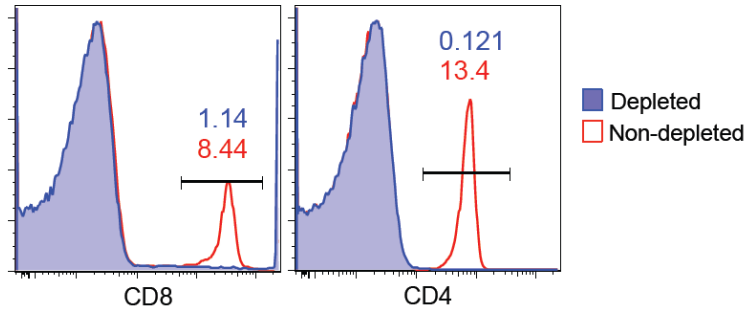

**Figure S1. Antibodies to CD4 and CD8 lymphocytes deplete the cells of interest *in vivo*.** Animals were treated as specified in Figure 1. Peripheral blood was collected 5 days after the initial injection and processed by flow cytometry for CD4+ and CD8+ cells with non-crossreactive antibodies. Gate percentages in red (bottom) and blue (top) represent the percentages of cells in non-depleted and depleted animals, respectively. Representative plots from 1 of 2 independent experiments with 5 mice per group are shown.

Figure S2

A

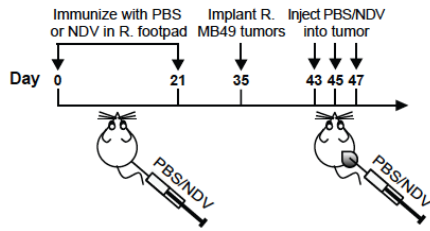

B

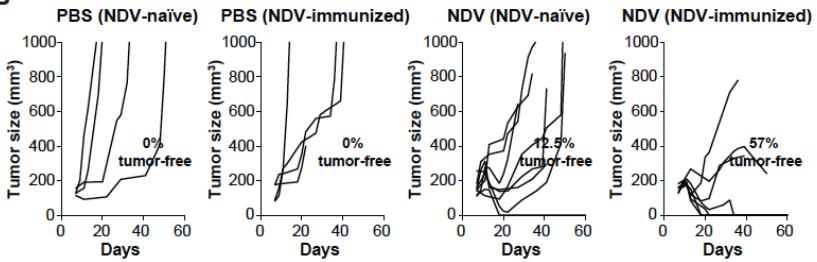

C

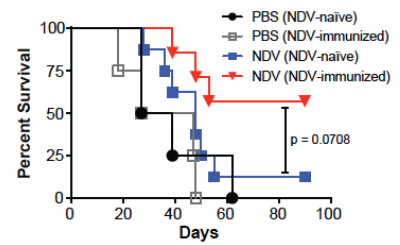

**Figure S2. Effect of pre-existing immunity to NDV on anti-tumor efficacy in the MB49 bladder tumor model.** (A) Treatment scheme. tumors were implanted by injection of  $2 \times 10^5$  cells into the right or bilateral flanks on day 35 intradermally ( $100 \mu\text{l}$ ). On days 43, 45 and 47, right tumors were injected with  $100 \mu\text{l}$  PBS or NDV ( $1 \times 10^7$  pfu). (B) Growth of injected tumors. (C) Overall survival. Data represent results from one of two independent experiments with  $n = 4$  (NDV-naïve PBS),  $n = 4$  (NDV-immunized PBS),  $n = 8$  (NDV-naïve NDV) and  $n = 7$  (NDV-immunized NDV).

Figure S3.

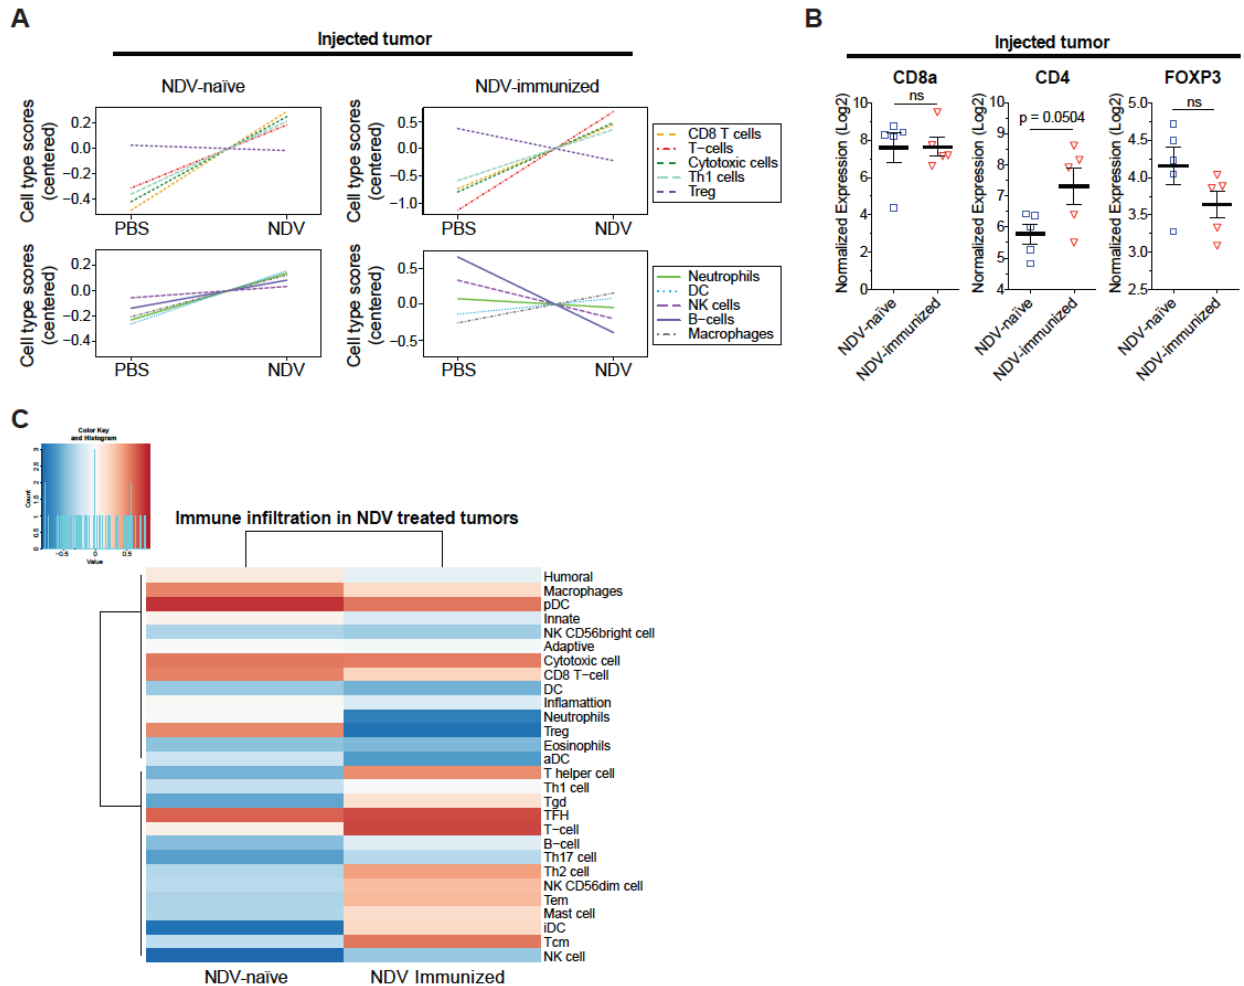

**Figure S3. NDV induces inflammatory effects in the microenvironment of the treated tumors.** Animals were treated according to the schema in Figure 2A. Gene expression analyses were performed using NanoString PanCancer immune profiling gene panel focusing on over 760 immune response-related genes. (A) Relative cell type gene signature scores in the virus-treated tumors compared to their respective controls. (B) Normalized gene expression for CD8a, CD4, and FoxP3 from the NDV-treated tumors of NDV-naïve and NDV-immunized mice. (C) Heat map displaying GSVA signature scores across immunological cell types for immunized and non-immunized NDV treated tumors. Data represent results from one experiment with  $n = 3$  (NDV-naïve PBS),  $n = 3$  (NDV-immunized PBS),  $n = 5$  (NDV-naïve NDV) and  $n = 5$  (NDV-immunized NDV). Mean  $\pm$  SEM is shown. ns, not significant.

Figure S4.

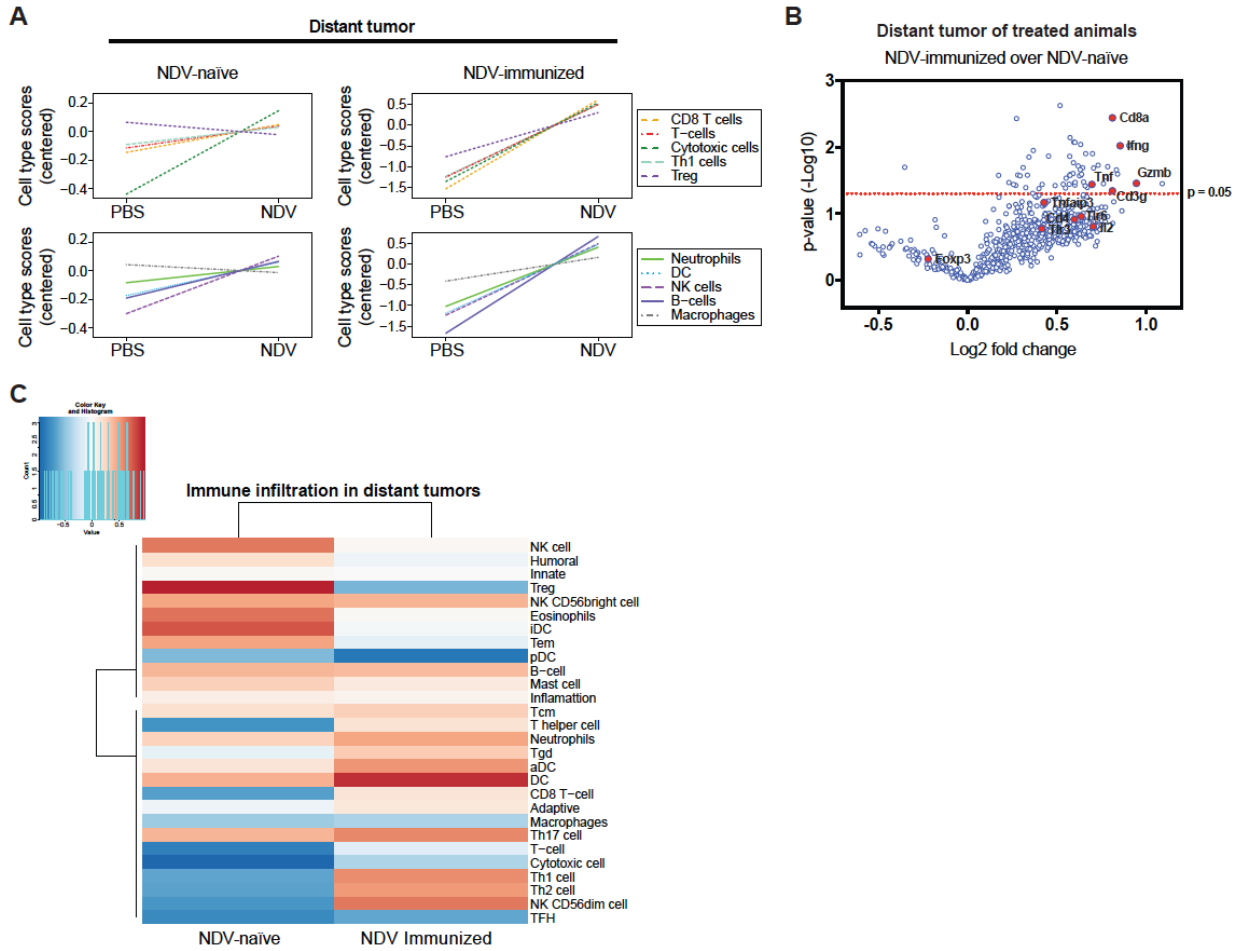

**Figure S4. Anti-NDV immunity potentiates abscopal inflammatory effects.** Animals were treated according to the schema in Figure 2A. Gene expression analyses were performed using NanoString PanCancer immune profiling gene panel focusing on over 760 immune response-related genes. (A) Relative cell type gene signature scores in the distant, non-injected tumors of NDV-treated NDV-immunized vs. NDV-treated NDV-naïve animals. (B) Global expression of immune-related genes in distant tumors of NDV-treated NDV-immunized vs. NDV-treated NDV-naïve animals. (C) Heat map displaying GSVA signature scores across immunological cell types for immunized and non-immunized NDV treated tumors. Data represent results from one experiment with n = 3 (NDV-naïve PBS), n = 3 (NDV-immunized PBS), n = 9 (NDV-naïve NDV) and n = 5 (NDV-immunized NDV).

Figure S5.

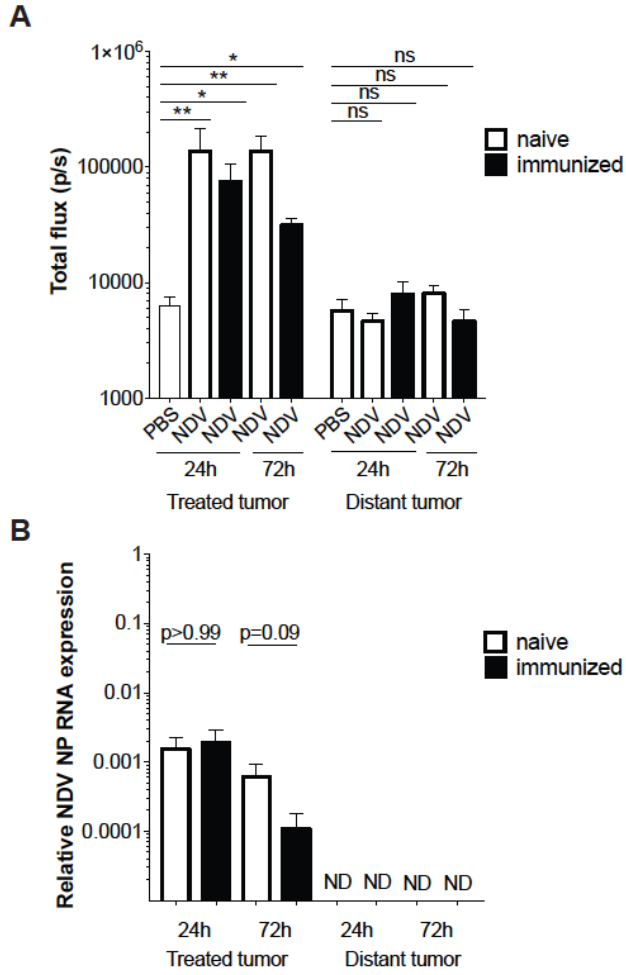

**Figure S5. Pre-existing immunity to NDV does not enhance viral spread to distant tumors.** Bilateral flank B16-F10 melanoma-bearing animals were treated with NDV expressing luciferase administered to a single flank tumor. A) Luminescence measured from the virus-treated and distant tumors. B) Levels of NDV NP RNA detected in the virus-treated and distant tumors measured by quantitative RT-PCR. ns, not significant; \* $p < 0.05$ ; \*\* $p < 0.01$

Figure S6.

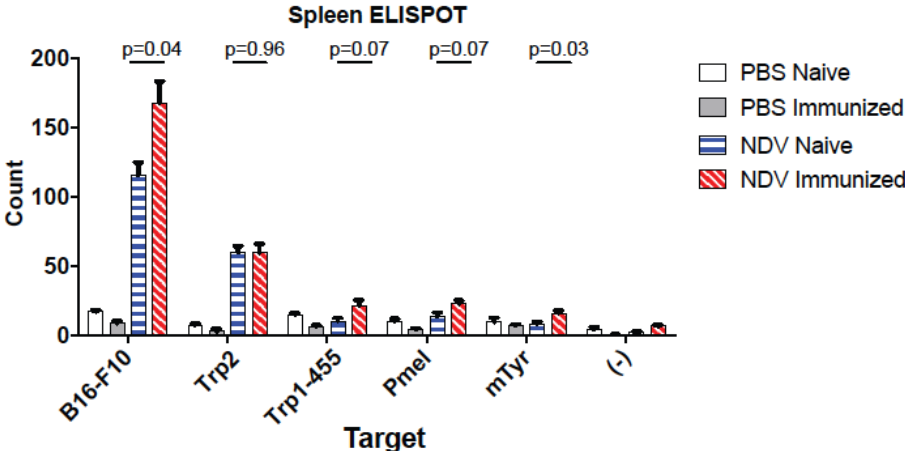

**Figure S6. Pre-existing immunity to NDV potentiates CD8 response to B16-F10 melanoma antigens.** Animals were treated as in Figure 3A, and splenic CD8+ lymphocytes were isolated and co-cultured with stimulator CD11b+ APCs loaded with the indicated peptides or irradiated B16-F10 cells at 1:1 ratio. IFN $\gamma$  production was assessed at 24 hours by ELISPOT assay.

Figure S7.

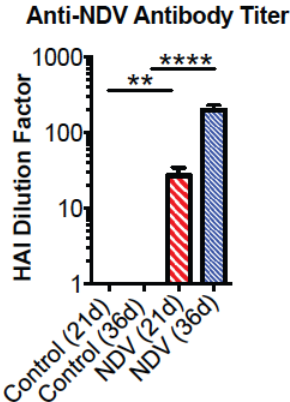

**Figure S7. Intratumoral NDV therapy leads to neutralizing anti-NDV antibodies.** Anti-NDV antibody serum titers from tumor-bearing animals after initial treatment and day 21 boost with NDV ( $n = 9$ ) or PBS ( $n = 8$ ) were determined by hemagglutination inhibition (HAI) of the serum samples collected at the specified time points. \*\* $p < 0.01$ ; \*\*\*\* $p < 0.0001$ .
